# Supplementary material
Source: HighWire-hosted journal article supplement (https://rapm.bmj.com/highwire/filestream/18391/field_highwire_adjunct_files/1/rapm-2021-103466supp002_data_supplement.pdf)

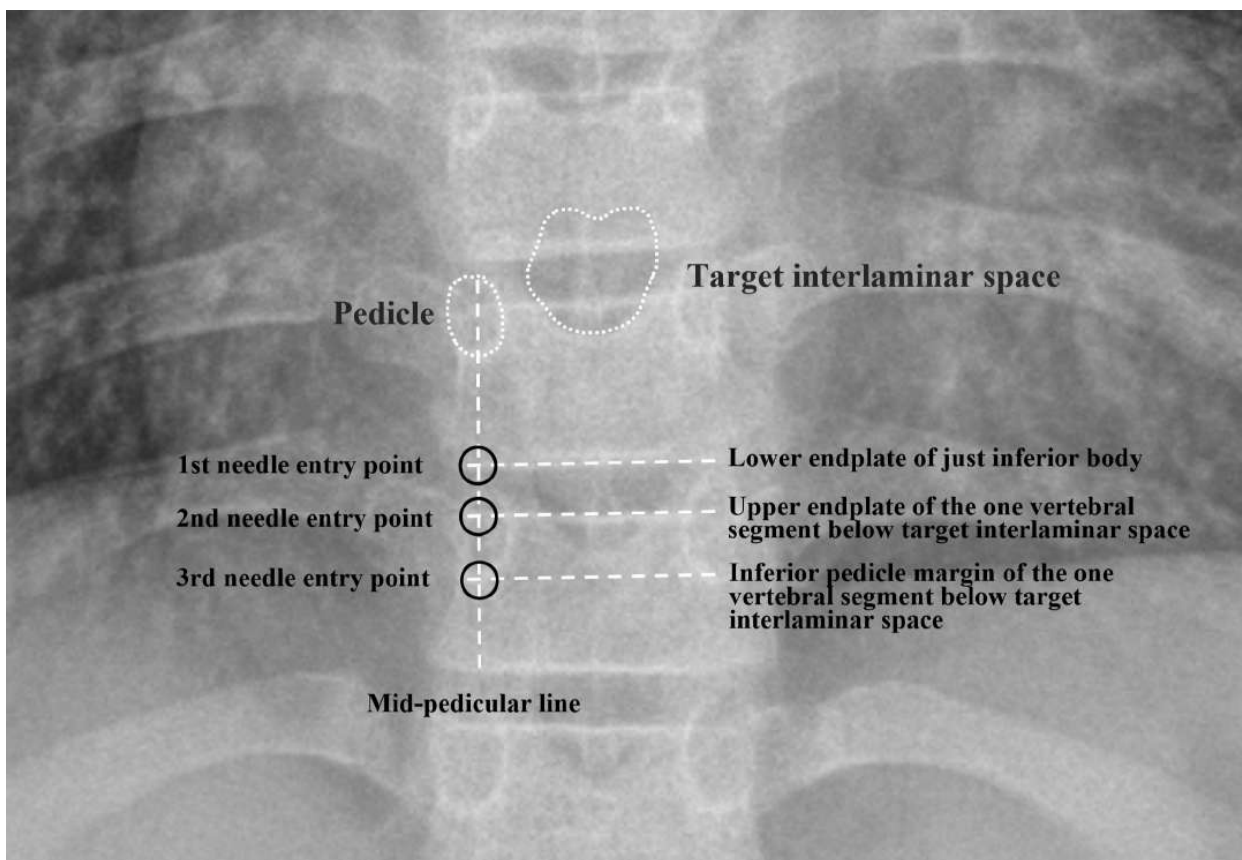

Supplement: rapm-2021-103466supp002_data_supplement.pdf [file rapm-2021-103466supp002_data_supplement.pdf]
